# Supplementary material
Source: MDPI journal article supplement (https://www.mdpi.com/2673-9984/2/1/47)
Supplement: s1 [file s1]

# Monopole solutions in $SU(2)$ Yang-Mills+ spinor field theory

Albina Serikbolova, Vladimir Dzhunushaliev, Vladimir Folomeev

al-Farabi Kazakh National University  
Physical and Technical Faculty  
Kazakhstan. Almaty city

# Overview:

## 1 Motivation of the Research

# Overview:

- 1 Motivation of the Research
- 2 Research objectives

# Overview:

- 1 Motivation of the Research
- 2 Research objectives
- 3 Main part of the Research

# Overview:

- 1 Motivation of the Research
- 2 Research objectives
- 3 Main part of the Research
- 4 Research results and conclusion

# Overview:

- 1 Motivation of the Research
- 2 Research objectives
- 3 Main part of the Research
- 4 Research results and conclusion
- 5 References

# Introduction

In particle physics, **magnetic monopole** is a hypothetical elementary particle with only one magnetic pole. As yet there is no evidence for the existence of magnetic monopoles, but they are interesting theoretically. Modern interest in the concept stems from particle theories, notably the grand unified and superstring theories, which predict their existence. They find their applications to a wide variety of topics in theoretical physics, including various problems in the standard model, astrophysics, and cosmology.

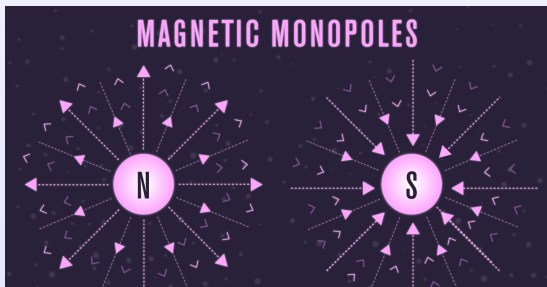

# Motivation of the Research

Firstly magnetic monopoles were proposed by P.A.M. Dirac In 1931 [1]. Later, magnetic monopoles in non-Abelian gauge theories were discovered by 't Hooft-Polyakov [2]-[3]. In theoretical physics, the 't Hooft–Polyakov monopole is similar to the Dirac monopole but without any singularities. Monopole solutions also were investigated in the non-Abelian Proca theory, which interacts with a scalar Higgs field and nonlinear spinor fields [4]. In this research, monopole solutions within  $SU(2)$  Yang-Mills theory containing a doublet of nonlinear spinor fields will be discussed. These solutions describe a magnetic monopole created by a spherical lump of nonlinear spinor fields.



# Research objectives

- 1 Obtain topologically trivial monopole solutions in these theory;

# Research objectives

- 1 Obtain topologically trivial monopole solutions in these theory;
- 2 Study energy spectra of these solutions;

# Research objectives

- 1 Obtain topologically trivial monopole solutions in these theory;
- 2 Study energy spectra of these solutions;
- 3 Search for a minimum of the spectrum.

# Lagrangian

The Lagrangian of non-Abelian SU(2) field  $A_\mu^a$  interacting with nonlinear spinor field  $\psi$  has the form:

$$\mathcal{L} = -\frac{1}{4}F_{\mu\nu}^a F^{a\mu\nu} + i\hbar c \bar{\psi} \gamma^\mu D_\mu \psi - m_f c^2 \bar{\psi} \psi + \frac{\Lambda}{2} g \hbar c (\bar{\psi} \psi)^2, \quad (1)$$

here  $m_f$  - mass of the spinor field;  $a, b, c = 1, 2, 3$  - color indices and  $\mu, \nu = 0, 1, 2, 3$  - spacetime indices. The corresponding field equations have the form:

$$D_\nu F^{a\mu\nu} = \frac{g\hbar c}{2} \bar{\psi} \gamma^\mu \sigma^a \psi, \quad (2)$$

$$i\hbar \gamma^\mu D_\mu \psi - m_f c \psi + \Lambda g \hbar c (\bar{\psi} \psi) = 0. \quad (3)$$

# Ansätze

The standard Ansätze for SU(2) monopole and spinor field:

$$A_i^a = \frac{1}{g} [1 - f(r)] \begin{pmatrix} 0 & \sin \varphi & \sin \theta \cos \theta \cos \varphi \\ 0 & -\cos \varphi & \sin \theta \cos \theta \sin \varphi \\ 0 & 0 & -\sin^2 \theta \end{pmatrix}, \quad i = r, \theta, \varphi, \quad (4)$$

$$A_t^a = 0, \quad (5)$$

$$\psi^T = \frac{e^{-i\frac{Et}{\hbar}}}{gr\sqrt{2}} \left\{ \begin{pmatrix} 0 \\ -u \end{pmatrix}, \begin{pmatrix} u \\ 0 \end{pmatrix}, \begin{pmatrix} iv \sin \theta e^{-i\varphi} \\ -iv \cos \theta \end{pmatrix}, \begin{pmatrix} -iv \cos \theta \\ -iv \sin \theta e^{i\varphi} \end{pmatrix} \right\}, \quad (6)$$

where  $E/\hbar$  is the spinor frequency and the functions  $u$  and  $v$  depend on the radial coordinate  $r$  only.

## Research methods

Equations for the unknown functions  $f$ ,  $u$ , and  $v$  can be obtained by substituting the expressions (4)-(6) into the field equations (2) and (3).

$$-f'' + \frac{f(f^2 - 1)}{x^2} + \tilde{g}^2 \frac{\tilde{u}\tilde{v}}{x} = 0, \quad (7)$$

$$\tilde{v}' + \frac{f\tilde{v}}{x} = \tilde{u} \left( -\tilde{m}_f + \tilde{E} + \tilde{\Lambda} \frac{\tilde{u}^2 - \tilde{v}^2}{x^2} \right), \quad (8)$$

$$\tilde{u}' - \frac{f\tilde{u}}{x} = \tilde{v} \left( -\tilde{m}_f - \tilde{E} + \tilde{\Lambda} \frac{\tilde{u}^2 - \tilde{v}^2}{x^2} \right). \quad (9)$$

Here  $x = r/r_0$  ( $r_0$  is a constant corresponding to the characteristic size of the system under consideration).

## Boundary conditions

Boundary conditions near the origin  $x = 0$  where solutions are sought in the form of the Taylor series:

$$f = 1 + \frac{f_2}{2}x^2 + \dots, \quad \tilde{u} = \tilde{u}_1x + \frac{\tilde{u}_3}{3!}x^3 + \dots, \quad \tilde{v} = \frac{\tilde{v}_2}{2}x^2 + \frac{\tilde{v}_4}{4!}x^4 + \dots, \quad (10)$$

where  $\tilde{v}_2 = 2\tilde{u}_1 (\tilde{E} - \tilde{m}_f + \tilde{\Lambda}\tilde{u}_1^2) / 3$  and the expansion coefficients  $f_2$  and  $\tilde{u}_1$  are free parameters. Eqs. (7)-(9) are solved numerically as a nonlinear problem for the eigenvalues  $f_2$  and  $\tilde{u}_1$  and the eigenfunctions  $\tilde{u}$ ,  $\tilde{v}$ , and  $f$ , whose typical behavior is shown in Fig. 1. The corresponding computed values of the system parameters are given in Table 1.

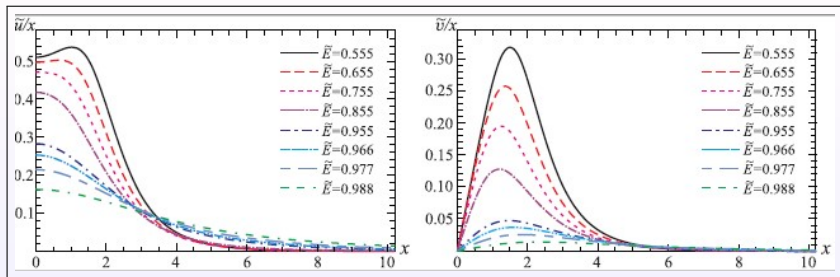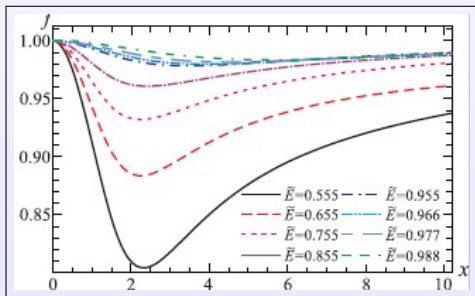

Figure: The functions  $\tilde{u}(x)/x$ ,  $\tilde{v}(x)/x$ , and  $f(x)$  for different values of the parameter  $\tilde{E}$  ( $\tilde{\lambda} = 8$ ,  $\tilde{m}_f = 1$ ,  $\tilde{g} = 1$ ).



Eigenvalues  $\tilde{u}_1$  and  $f_2$  and the total energy  $\tilde{W}_t$  for different values of the parameter  $\tilde{E}$ :

The ground state:

|               |          |          |           |         |           |          |         |         |
|---------------|----------|----------|-----------|---------|-----------|----------|---------|---------|
| $\tilde{E}$   | 0.555    | 0.655    | 0.755     | 0.855   | 0.955     | 0.966    | 0.977   | 0.988   |
| $f_2$         | -0.21167 | -0.1438  | -0.092587 | -0.0519 | -0.016338 | -        | -       | -       |
|               |          |          |           |         |           | 0.012473 | 0.00854 | 0.00466 |
| $\tilde{u}_1$ | 0.510757 | 0.497238 | 0.47145   | 0.41848 | 0.2834    | 0.25342  | 0.2151  | 0.163   |
| $\tilde{W}_t$ | 15.6339  | 11.7187  | 8.6202    | 6.4621  | 5.8124    | 6.04989  | 6.5242  | 7.3827  |

The first excited state, one node solutions:

|               |          |            |           |            |          |
|---------------|----------|------------|-----------|------------|----------|
| $\tilde{E}$   | 0.755    | 0.855      | 0.955     | 0.977      | 0.988    |
| $f_2$         | -0.43377 | -0.23663   | -0.087295 | -0.0526425 | -0.03217 |
| $\tilde{u}_1$ | 0.6005   | 0.57331012 | 0.494131  | 0.43494    | 0.37143  |
| $\tilde{W}_t$ | 76.182   | 62.582     | 53.748    | 57.3803    | 65.957   |

# Magnetic Yang-Mills field

The radial magnetic field:

$$H_r^a \sim \frac{2f_\infty}{gr^3}, \quad (11)$$

Nonzero tangential components of the magnetic field are:

$$H_\theta^a \sim \frac{1}{g}f', \quad H_\varphi^b \sim \frac{1}{g}f', \quad (12)$$

where  $a = 1, 2, 3$  and  $b = 1, 2$ . The corresponding graphs for these components are shown in Fig. 4.

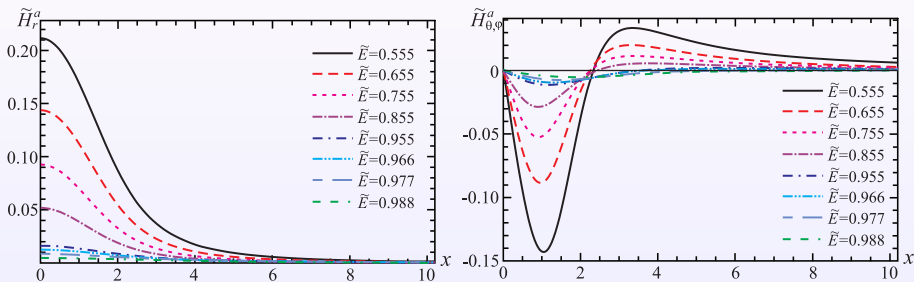

Figure: The distributions of the color magnetic fields for different values of the parameter  $\tilde{E}$ : the radial component  $\tilde{H}_r^a \equiv gr_0^2 H_r^a$  is given by Eq. (11) and the tangential components  $\tilde{H}_{\theta,\varphi}^a \equiv gr_0 H_{\theta,\varphi}^a$  – by Eq. (12).

# Energy density

The total energy density of the monopole-plus-spinor-fields system under consideration is

$$\tilde{\epsilon} = \tilde{\epsilon}_m + \tilde{\epsilon}_s = \frac{1}{\tilde{g}^2} \left[ \frac{f'^2}{x^2} + \frac{(f^2 - 1)^2}{2x^4} \right] + \left[ \tilde{E} \frac{\tilde{u}^2 + \tilde{v}^2}{x^2} + \frac{\tilde{\Lambda}}{2} \frac{(\tilde{u}^2 - \tilde{v}^2)^2}{x^4} \right], \quad (13)$$

where  $\tilde{\epsilon}_m \equiv (r_0^4/\hbar c) \epsilon_m$ - energy density of the monopole,  
 $\tilde{\epsilon}_s \equiv (r_0^4/\hbar c) \epsilon_s$ -energy density of spinor field.

# Energy density

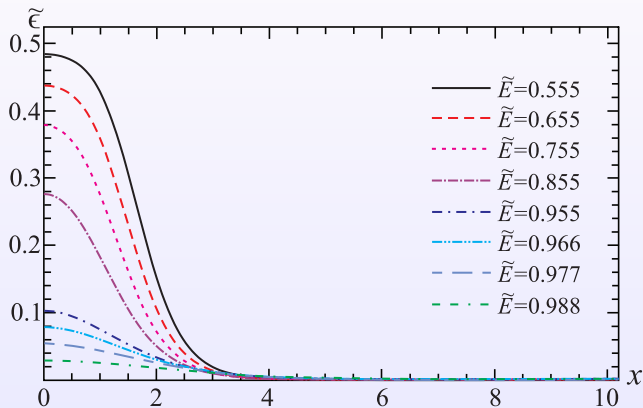

Figure: The energy density  $\tilde{\epsilon}$  from Eq. (13) for different values of the parameter  $\tilde{E}$ .

# Energy spectrum

Total energy of the system:

$$\tilde{W}_t = 4\pi \int_0^\infty x^2 \tilde{\epsilon} dx = \left(\tilde{W}_t\right)_m + \left(\tilde{W}_t\right)_s. \quad (14)$$

$\left(\tilde{W}_t\right)_m$  - energy of the monopole,  $\left(\tilde{W}_t\right)_s$  - energy of the spinor field. The calculated data for  $\tilde{W}_t$  given in Table 1.

# Energy spectrum

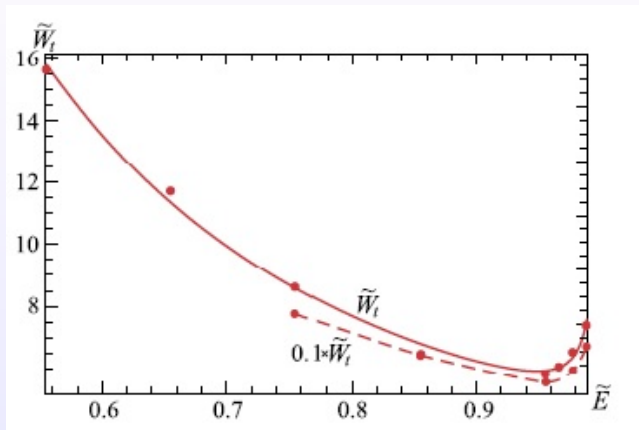

Figure: The spectrum of the total energy  $\tilde{W}_t$  for the ground (solid line) and excited (dashed line) as functions of the parameter  $\tilde{E}$ .

## Research results

- 1 We have found regular finite-energy monopole solutions in  $SU(2)$  Yang-Mills theory which includes spinor fields described by the nonlinear Dirac equation are obtained.



## Research results

- 1 We have found regular finite-energy monopole solutions in  $SU(2)$  Yang-Mills theory which includes spinor fields described by the nonlinear Dirac equation are obtained.
- 2 It is demonstrated that the energy spectrum has a global minimum, both for the ground state and for the first excited state.

## Research results

- 1 We have found regular finite-energy monopole solutions in  $SU(2)$  Yang-Mills theory which includes spinor fields described by the nonlinear Dirac equation are obtained.
- 2 It is demonstrated that the energy spectrum has a global minimum, both for the ground state and for the first excited state.
- 3 It is shown that the main reason for the appearance of the minimum in the energy spectrum is the presence of the non-linear spinor fields.

## Research results

- 1 We have found regular finite-energy monopole solutions in  $SU(2)$  Yang-Mills theory which includes spinor fields described by the nonlinear Dirac equation are obtained.
- 2 It is demonstrated that the energy spectrum has a global minimum, both for the ground state and for the first excited state.
- 3 It is shown that the main reason for the appearance of the minimum in the energy spectrum is the presence of the non-linear spinor fields.
- 4 It is shown that the monopole solution obtained differs in principle from the 't Hooft-Polyakov monopole.

# References

-  Paul Dirac, "Quantised Singularities in the Electromagnetic Field". Proc. Roy. Soc. (London) A 133, 60 (1931).
-  't Hooft, G., "Magnetic monopoles in unified gauge theories" . Nuclear Physics B. 79 (2), (1974).
-  Polyakov, A.M., "Particle Spectrum in the Quantum Field Theory". JETP Letters. 20 (6), (1974).
-  V. Dzhunushaliev, V. Folomeev, and A. Makhmudov, "Non-Abelian Proca-Dirac-Higgs theory: Particlelike solutions and their energy spectrum," Phys. Rev. D 99, 076009 (2019).
-  S. K. Wong, "Field and particle equations for the classical Yang-Mills field and particles with isotopic spin," Nuovo Cim. A 65, 689 (1970).

**Thanks for your attention !**
